# Supplementary material for: Relationships between tryptophan-related gut metabolites, brain activity, and autism symptomatology
Source: Research Square preprint supplement (doi:10.21203/rs.3.rs-4559624/v1), 2024-07-25
Supplement: Supplementary file 1 [file 9207bcc00735dcd4b7fd3946.docx]

**Supplementary Materials.**

Supplementary Methods.

Supplemental Figure 1: Still image examples of stimuli used for each fMRI Task
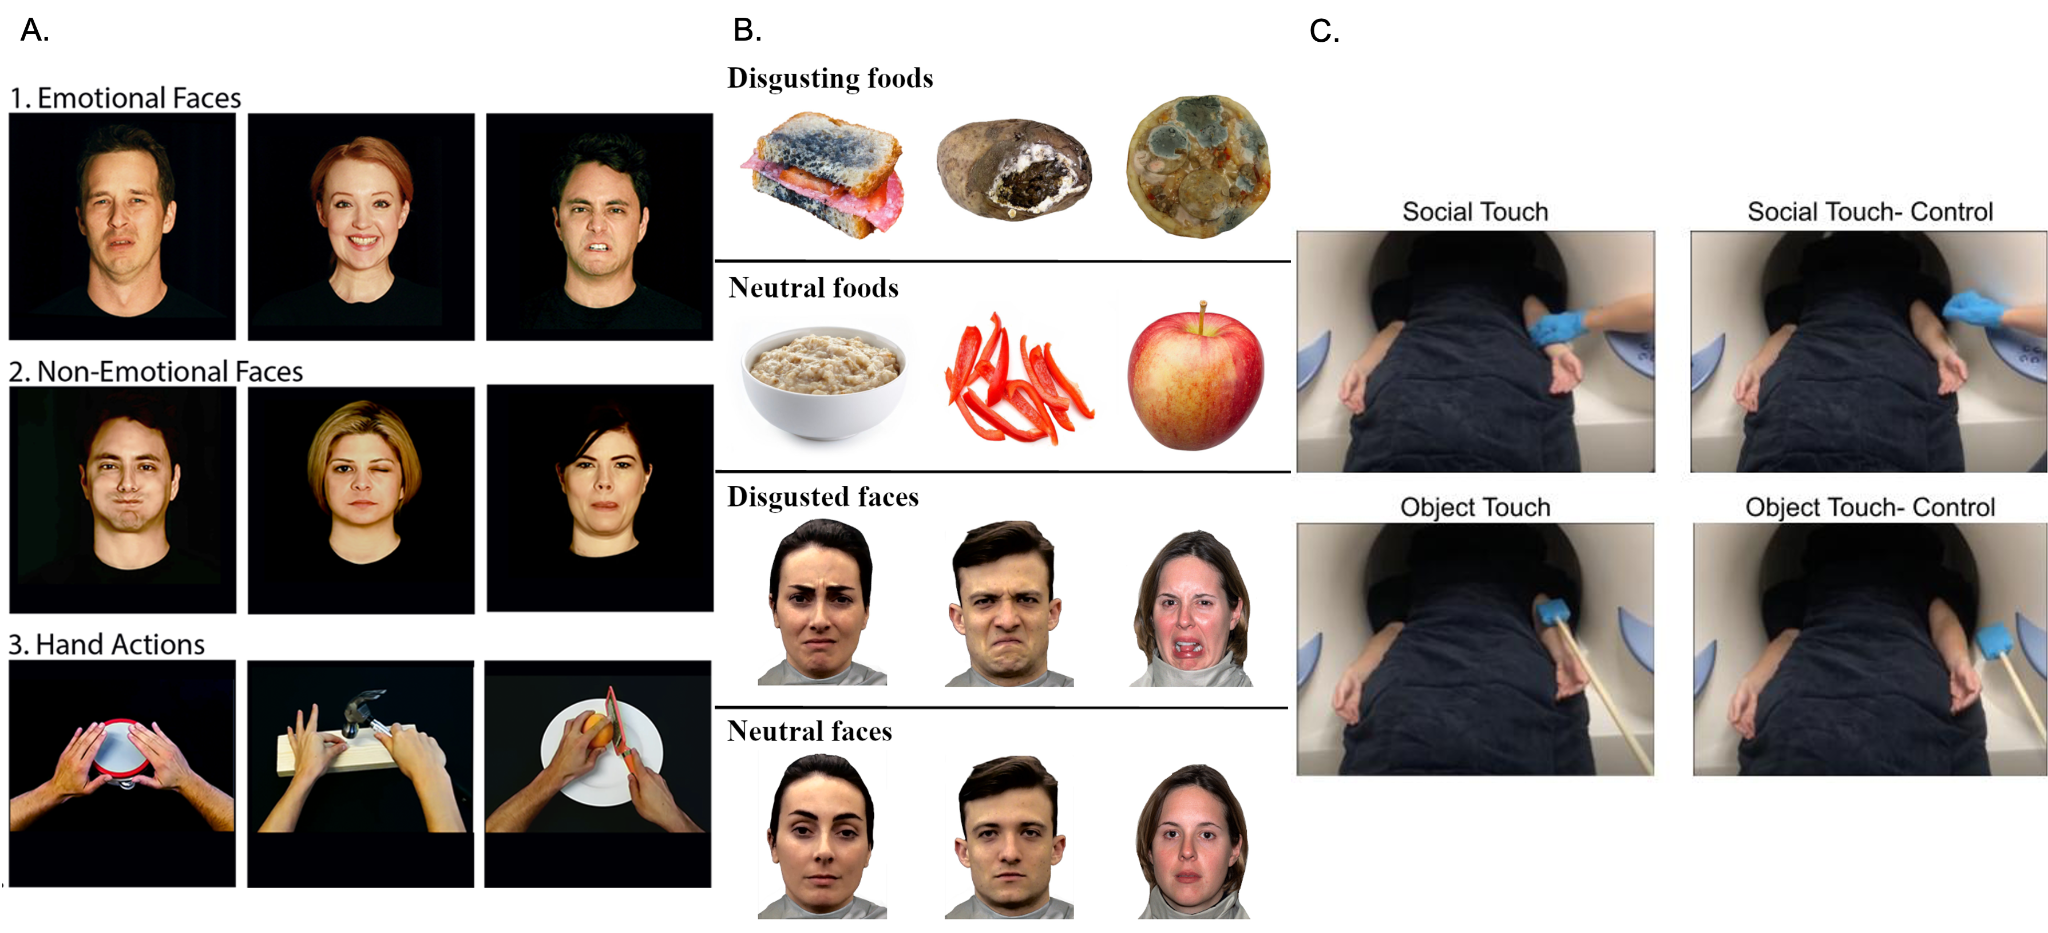


*Note.* For all tasks, participants were instructed to simply watch the stimuli. **A**. Watching videos of facial expressions and hand actions: Stimuli were divided into three categories: emotional facial expressions, non-emotional facial expressions, and bimanual hand actions. **B.** Disgust Processing. There were four categories of stimuli: disgusting foods and faces, and neutral foods and faces. **C**. Watching others being touched. There were four different videos where a person strokes the arm of another person in the MRI scanner with: a) their hand with glove on (social touch), b) a dry sponge (object touch), c) their hand with glove on hovering next to the person’s arm (social touch control), and d) a dry sponge hovering next to the person’s arm (object touch control).

Behavioral Measures.

Autism Diagnostic Interview-Revised (ADI-R)85: The ADI-R is a structured interview classically used for diagnosing ASD, planning treatment, and distinguishing ASD from other developmental disorders. The ADI-R has three domains: language/communication, reciprocal social interactions, and repetitive behaviors/interests. The ADI-R was administered by a research staff member with the parents of children in the ASD group.

Autism Diagnostic Observation Schedule, Second Edition (ADOS-2)58: The ADOS-2 is a standardized, observational assessment to assess and diagnose Autism Spectrum Disorders. Research reliable staff administered the ADOS-2 to children in the ASD group to verify ASD diagnosis. Module 3 or Module 4 were utilized depending on the child’s age. As the two modules have two different scoring algorithms, for data analysis we utilized the module 3 algorithm to calculate comparable scores for participants that were assessed with module 4.

Alexithymia Questionnaire for Children (AQC)63: The AQC is a standardized, self-reported questionnaire for children aged 9-15 to assess three domains of alexithymia including difficulty describing feelings, difficulty identifying feelings, and externally oriented thinking. The difficulty describing feelings and difficulty identifying feelings scores were combined for a two-factor total. The externally oriented thinking subscore was not used in this study due to its low Cronbach’s alpha in children.86
 Adolescent Sleep Wake Scale (ASWS)66: Self-reported sleep quality was measured with the ASWS. The ASWS has five dimensions: going to bed, falling asleep, maintaining sleep, reinitiating sleep, and returning to wakefulness. A full-scale sleep quality score is obtained by taking the mean of the subscales. The full-scale sleep quality score was used in this study.

Body Perception Questionnaire- Very Short Form (BQP-VSF)64: The BPQ-VSF is a self-reported measure of interoception. The very short form includes 12 items with the highest factor loadings to generate high fidelity scores from the original measure.87

Conners 3rd Edition ADHD Index- Parent (Conners 3AI)56: The Conners 3AI-Parent is a parent reported measure of attention deficit hyperactivity disorder (ADHD) symptoms for children 6-18 years old. It was used as a screening measure for the NT group but not the ASD group, as ADHD is highly co-occurring with ASD.88

Disgust Propensity and Sensitivity Scale-Revised (DPSS-R)89: The child version of the DPSS-R is a self-reported measure used to assess the frequency of disgust experiences (disgust propensity) and the negative emotional impact of disgusting stimuli (disgust sensitivity).

Family Inventory of Sleep Habits (FISH)90: The FISH is a parent-completed questionnaire to assess sleep habits in children. The scale includes questions related to daytime routine, pre-bedtime habits, sleep environment, bedtime routine, and parental habits. The total score was used in this study as an overall measure of sleep habits.

Gastrointestinal Symptom Rating Scale (GSRS)91: The GSRS is a self-reported instrument to assess the presence of gastrointestinal symptoms.
 Screen for Child Anxiety Related Emotional Disorders- Parent (SCARED P)61: The SCARED-P is a parent reported measure of anxiety symptoms in children aged 8-18 years old. It has five subscales: separation anxiety, generalized anxiety, social anxiety, panic or somatic symptoms, and school avoidance, which can be combined to obtain a total anxiety score.

Sensory Experiences Questionnaire, Version 3.0 (SEQ)60: The SEQ is a parent-reported measure of sensory response patterns (hypersensitivity, hyposensitivity, enhanced perception, and sensory interests, repetitions, and seeking), sensory modalities (tactile, auditory, gustatory, auditory, vestibular/proprioception), and sensory contexts (non-social and social). The hypersensitivity, hyposensitivity, enhanced perception, non-social, social, and vestibular/proprioception were used as variables of interest in this study due to their hypothesized relationships with the fMRI tasks and/or metabolites.

Social Responsiveness Scale, 2nd Edition (SRS-2)57: The SRS-2 is a parent reported questionnaire for children aged 4-18 years that is used as both a screening tool and to aid in clinical diagnosis of ASD. The measure includes questions related to restrictive interests, repetitive behaviors, deficits in social interactions, and social communication.

Wechsler Abbreviated Scale of Intelligence (WASI-II)54: The WASI-II is a standardized measure of intelligence for ages 6-90. There are four subtests: block design, vocabulary, matrix reasoning, and similarities. Block design and matrix reasoning are combined to obtain a perceptual reasoning index (PRI) and vocabulary and similarities are combined for a verbal comprehension index (VCI). The full-scale intelligence quotient (FSIQ) consists of all four subtests. The WASI-II was administered by trained research staff.

Additional Metabolite-Behavior Correlations:As a post-hoc analysis, we ran GLMs with all primary variables and all tryptophan metabolites (See Supplemental Table 5). The GLM model included group as a factor, and sex, age, IQ and BMI were included as covariates.

Supplementary Results

Supplemental Table 1 lists participant demographics and behavioral differences between groups. Supplemental Table 2 lists participant demographics by group. Supplemental Table 3 lists significant between-group differences in brain activity by task and condition. ROI associations with additional behavioral variables are presented in Supplemental Table 4. The results of two post-hoc analyses can be found in Supplemental Table 5. Supplemental Table 6 lists significant correlations between ROI activity and metabolites in the NT group. Supplemental 7 lists significant Metabolite- Behavior Associations in the NT group.

Supplemental Table 1: Participant Demographics and Behavioral Differences Between Groups

|  | TD (N=41) | | | ASD (N=43) | | | *p* |
| --- | --- | --- | --- | --- | --- | --- | --- |
| Variable | n | M/n(%) | SD | n | M/n(%) | SD |
| Sex (Male) | 21 | - | - | 32 | - | - | 0.041 |
| Age | 41 | 11.86 | 2.44 | 43 | 12.06 | 2.4 | 0.725 |
| FSIQ | 41 | 118.68 | 13.63 | 43 | 104.07 | 18.02 | <0.001 |
| BMI | 41 | 18.3 | 3.1 | 43 | 21.02 | 5.41 | 0.003 |
| ADOS-2 Social Affect | - | - | - | 43 | 9.7 | 3.48 | N/A |
| ADOS-2 RRBs | - | - | - | 43 | 2.51 | 1.37 | N/A |
| ADOS-2 Total | - | - | - | 43 | 12.21 | 3.74 | N/A |
| ADI-R RSI | - | - | - | 43 | 17.08 | 7.1 | N/A |
| ADI-R RRBs | - | - | - | 43 | 6.76 | 3.21 | N/A |
| Antibiotic usage- Infant- Y(%) | 38 | 12 (34) | N/A | 39 | 16 (41) | N/A | 0.479 |
| Prenatal antibiotic usage Y(%) | 39 | 0 (0) | N/A | 39 | 7 (18) | N/A | 0.012 |
| Breastfed Y(%) | 37 | 36 (97) | N/A | 38 | 36 (95) | N/A | 1.000 |
| C-Section Delivery Y(%) | 39 | 15 (38) | N/A | 39 | 14 (36) | N/A | 1.000 |
| Diet Type (Modified American) Y(%) | 32 | 23 (72) | N/A | 33 | 20 (61) | N/A | 0.434 |
| GSRS Total | 31 | 20.35 | 4.03 | 31 | 27.1 | 10.5 | <0.001 |
| ASWS Total | 25 | 4.37 | 0.69 | 25 | 3.92 | 0.75 | 0.032 |
| FISH Total | 31 | 48.26 | 6.25 | 33 | 45.55 | 5.61 | 0.073 |
| SRS T-Score | 41 | 44.68 | 4.29 | 43 | 73.28 | 9.66 | <0.001 |
| SEQ Non-social | 23 | 1.35 | 0.18 | 23 | 2.28 | 0.6 | <0.001 |
| SEQ Social | 23 | 1.44 | 0.23 | 23 | 2.44 | 0.59 | <0.001 |
| SEQ Vestibular/Proprioception | 23 | 1.41 | 0.23 | 23 | 1.99 | 0.57 | <0.001 |
| SEQ Hyposensitivity | 23 | 1.17 | 0.12 | 23 | 1.85 | 0.5 | <0.001 |
| SEQ Hypersensitivity | 23 | 1.4 | 0.25 | 23 | 2.55 | 0.65 | <0.001 |
| Conners Parent Probability | 41 | 15.37 | 11.59 | 43 | 80.84 | 25.64 | <0.001 |
| SCARED-P Total | 40 | 6.63 | 7.8 | 41 | 22.02 | 16.41 | <0.001 |
| DPSS-R Disgust Propensity | 21 | 21 | 4.42 | 23 | 25.65 | 6.88 | 0.012 |
| DPSS-R Disgust Sensitivity | 21 | 10.62 | 3.69 | 23 | 14.48 | 6.58 | 0.010 |
| BPQ-VSF | 31 | 27.29 | 13.79 | 30 | 26.27 | 9.38 | 0.737 |
| AQC- 2 factor total | 41 | 7.1 | 4.77 | 42 | 10.21 | 4.69 | 0.004 |

*Note.* n: number; M: mean; SD: standard deviation; p: p-value; NT: Neurotypical; ASD: Autism Spectrum Disorder; FSIQ: Full- Scale Intelligence Quotient, BMI: Body Mass Index; Autism Diagnosis Observation Schedule; ADI-R: Autism Diagnostic Interview-Revised; RSI: Reciprocal Social Interaction; RRBs: Restricted, Repetitive, and Stereotyped Behavior; Y: Yes; Std: Standard; GSRS: Gastrointestinal Symptom Rating Scale, ASWS: Adolescent Sleep Wake Scale; FISH: Family Inventory of Sleep Habits; SRS: Social Responsiveness Scale; SEQ: Sensory Experience Questionnaire; SCARED-P: Screen for Anxiety Related Disorders- Parent; DPSS-R: Disgust Propensity and Sensitivity Scale Revised; BPQ-VSF: Body Perception Questionnaire Very Short Form; AQC: Alexithymia Quotient for Children.

Supplemental Table 2: Race and Ethnicity by Group

|  | NT (N=41) | ASD (N=43) |
| --- | --- | --- |
|  | n | n |
| Ethnicity |  |  |
| Hispanic/Latino | 12 | 13 |
| Not Hispanic/Latino | 23 | 29 |
| Decline to answer | 1 | 0 |
| Missing | 5 | 1 |
| Race* |  |  |
| American Indian/Alaska Native | 1 | 4 |
| Asian | 10 | 4 |
| Black/African American | 5 | 6 |
| Native Hawaiian/Pacific Islander | 1 | 0 |
| White | 26 | 32 |
| Other | 2 | 3 |
| Decline to answer | 1 | 0 |
| Missing | 4 | 1 |

*Note.* *Participants could select more than one race

Supplemental Table 3: Significant between-group differences in brain activity by task and condition

| **Task** | **Condition** | **Contrast** | **Hemisphere** | **Region** | **Max Z** | **MNI Coordinates**  **(x,y.z)** |
| --- | --- | --- | --- | --- | --- | --- |
| Watching videos of facial expressions and hand actions (N=78) | All stimuli>Rest | NT>ASD | R | IFGop | 3.51 | 42,20,18 |
| NT>ASD | L | MCC | 3.28 | -2,20,43 |
| Watching pictures of disgust facial expressions or disgusting foods (N=46) | Disgusted Faces>Rest | ASD>NT | R | vAI | 3.65 | 42,18,-10 |
| ASD>NT | - | pACC | 3.96 | 0,40,22 |
| ASD>NT | L | dAI | 3.37 | -30,2,14 |
| NT>ASD | R | MI | 3.35 | 43,10,-14 |
| NT>ASD | R | FFA | 3.05 | 36,-56,-20 |
| Disgusting Foods> Rest | NT>ASD | R | MI | 3.41 | 42,-1,-10 |
| NT>ASD | L | vAI | 2.86 | -34,11,-12 |
| Watching videos of others being touched (N=37) | All touch>Rest | NT>ASD | R | S1 | 3.92 | 32,-26,48 |
| NT>ASD | L | PI | 2.94 | -42,-16,13 |
| NT>ASD | L | MI | 2.82 | -38,-7,-6 |
| NT>ASD | - | aMCC/dmPFC | 3.97 | -2,44,34 |
| NT>ASD | R | MCC | 3.6 | 10,-6,42 |

*Note.* Significant between group differences in brain activity by task in each condition. Participants took part in 3 separate fMRI tasks: 1) watching videos of people making facial expressions or hand actions; 2) watching photographs of disgust facial expressions or foods the participant deemed as disgusting; 3) watching videos of others being touched by a hand or a stick. Peak voxel coordinates are provided according to the Montreal Neurological Institute (MNI) coordinate system*.* NT: Neurotypical, ASD: Autism Spectrum Disorder, R: Right; L: Left; IFGop: Right inferior frontal gyrus pars opercularis; MCC: mid-cingulate cortex; vAI:ventral anterior insula; pACC: pregenual anterior cingulate cortex; dAI: left dorsal anterior insula; MI:mid-insula; R_FFA: Right Fusiform Face Area; S1: Primary somatosensory cortex;PI: posterior insula; aMCC/dmPFC: anterior mid-cingulate cortex/dorsal medial prefrontal cortex

Supplemental Table 4: ROI Associations with Additional Behavioral Variables

| **Facial Expressions / Hand Actions** | | | | | | | | |
| --- | --- | --- | --- | --- | --- | --- | --- | --- |
| **Hemisphere** | **Region** | **Stimuli** | **Variable** | **N** | **Std. β** | **SE** | ***p*** | ***q*** |
| L | MCC | Hands | Conners Probability | 43 | -0.449 | 0.001 | 0.003 | 0.038 |
| L | MCC | All Faces + Hands | Conners Probability | 43 | -0.385 | 0.001 | 0.018 | 0.06 |
| L | MCC | Emo Faces | Conners Probability | 43 | -0.338 | 0.001 | 0.018 | 0.06 |
| **Touch** | | | | | | | | |
| **Hemisphere** | **Region** | **Stimuli** | **Variable** | **N** | **Std. β** | **SE** | ***p*** | ***q*** |
| - | aMCC/dmPFC | Object Touch | FISH Total | 18 | 0.739 | 0.014 | 0.002 | 0.017 |

Note. L: Left; Std. β: standardized beta; SE: standardized error; *p*: p-value: *q*: FDR value; MCC: mid-cingulate cortex; Conners Probability is a screening for attention deficit hyperactivity disorder (ADHD); aMCC/dmPFC:anterior mid-cingulate cortex/dorsal medial prefrontal cortex; FISH: Family Inventory of Sleep Habits

Supplemental Table 5:Post-hoc analysis of TryptophanMetabolite-Behavior Associations Within ASD with all tryptophan metabolites

| **Metabolite** | **Variable** | **N** | **Std. β** | **SE** | ***p*** | ***q*** |
| --- | --- | --- | --- | --- | --- | --- |
| Indolepropionate | AQC Two-Factor Total | 42 | 0.537 | 0.028 | <0.001 | 0.01 |
| X3-indoxyl-sulfate | ADI-R RSI | 43 | 0.608 | 0.022 | <0.001 | 0.011 |
| Tryptophol | SEQ Vestibular | 23 | 0.652 | 0.291 | 0.001 | 0.017 |
| Tryptophol | SEQ Nonsocial | 23 | 0.666 | 0.297 | 0.001 | 0.027 |
| N-acetyltryptophan | ADI-R RSI | 43 | 0.523 | 0.021 | 0.002 | 0.031 |
| 5-hydroxypicolinic Acid | DPSS-R Propensity | 23 | 0.668 | 0.025 | 0.003 | 0.084 |

*Note.* AQC: Alexithymia Questionnaire for Children;ADI-R: Autism Diagnostic Interview- Revised; RSI: Abnormalities in Reciprocal Social Interaction; SEQ: Sensory Experiences Questionnaire; DPSS-R: Disgust Propensity and Sensitivity Scale - Revised

Supplemental Table 6: ROI-Metabolite Associations in the NT group

| **Disgust Processing (N=22)** | | | | | | | |
| --- | --- | --- | --- | --- | --- | --- | --- |
| Hemisphere | Region | Stimuli | Metabolite | Std. β | SE | p | q |
| Left | DorsaI anterior Insula | Disgusted Faces | Indole-3-carboxylate | -0.537 | 0.034 | 0.011 | 0.068 |
| **Watching Others being Touched (N=19)** | | | | | | | |
| Hemisphere | Region | Stimuli | Metabolite | Std. β | SE | p | q |
| Right | Mid-Insula | Object Touch | Kynurenate | -0.713 | 0.044 | 0.006 | 0.063 |

Note. Std. β: Standardized beta; *p*: p-value: *q:* FDR value

Supplemental Table 7: Metabolite-Behavior Associations in the NT group

| **Metabolite** | **Variable** | **N** | **Std. β** | **SE** | **p** | **q** |
| --- | --- | --- | --- | --- | --- | --- |
| Tryptophol | Conners Probability | 41 | 0.012 | 0.028 | <0.001 | 0.002 |
| 5-hydroxypicolinic Acid | Cesarean Section Delivery | 39 | -0.460 | 0.294 | 0.002 | 0.055 |
| Picolinate | Cesarean Section Delivery | 39 | -0.396 | 0.300 | 0.007 | 0.093 |

Std. β: Standardized beta; *p*: p-value: *q:* FDR value
